# Supplementary material for: Synergistic and non-synergistic impact of HAP-based nano fertilizer and PGPR for improved nutrient utilization and metabolite variation in hemp crops
Source: Royal Society of Chemistry journal article supplement (doi:10.1039/d3en00380a), 2023-01-01
Supplement: d3en00380a1.pdf [file d3en00380a1.pdf]

### The phosphate-solubilization potential of microbes

Phosphate-solubilization test was conducted qualitatively by inoculating the bacteria in NBRIP media plates containing precipitated tricalcium phosphate with bromocresol purple dye shown in Figure 1. Tricalcium phosphates solubilization changes the pH. The plates were incubated at  $28 \pm 2^\circ\text{C}$  for 6 days, and then colour change and halo formation were observed. A clear yellow zone indicates organic acid production which solubilizes the insoluble phosphorus. The *Bacillus megaterium* has higher P solubilizing activity than *Pseudomonas aeruginosa*.

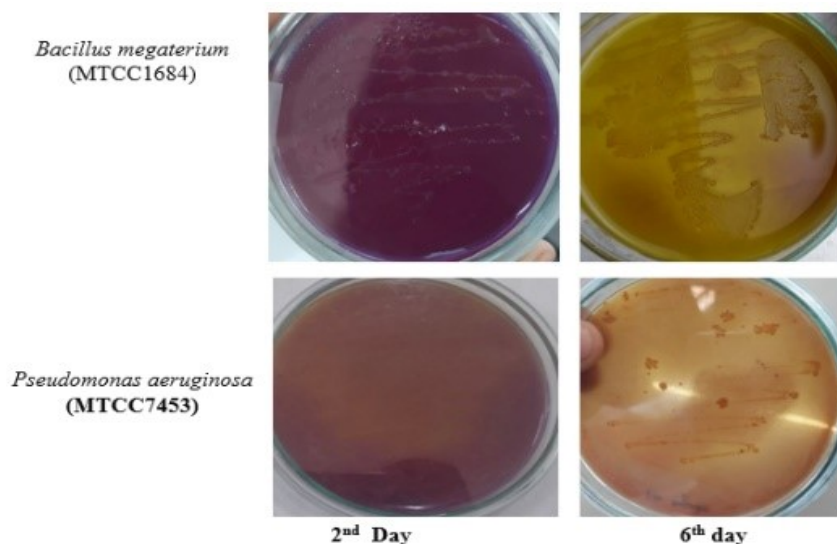

Figure 1 Solubilization of Tri-calcium phosphate on NBRIP media with bromocresol purple dye

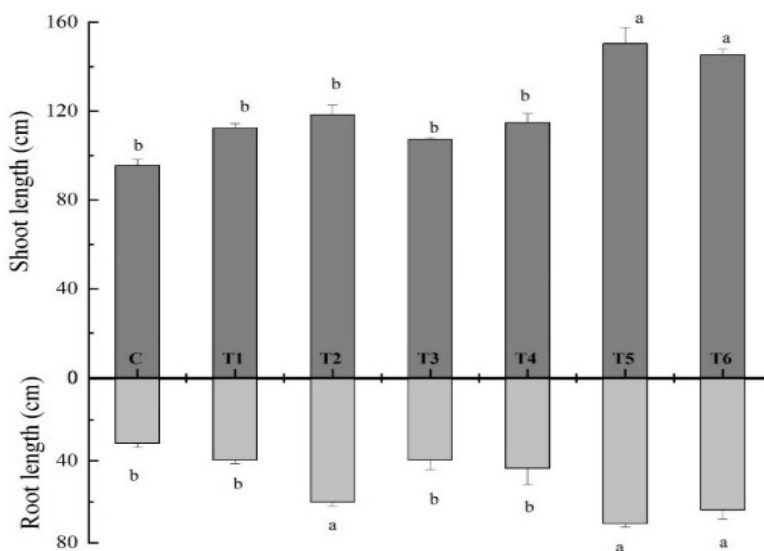

Figure 2 Sole and combined treatment of synthesized fertilizer and Biofertilizer on root and shoot length of Cannabis sativa L. crop.

Table 1 IUPAC name, Chemical formula, Retention time (RT), and Similarity index (SI) of identified compounds are given in table

| Sr. No. | Identified compound                 | IUPAC name                                                                       | Chemical Formula                               | Chemical Structure                                                                    | RT     | CAS number | SI  |
|---------|-------------------------------------|----------------------------------------------------------------------------------|------------------------------------------------|---------------------------------------------------------------------------------------|--------|------------|-----|
| 1       | Palmitic acid, methyl ester         | Hexadecanoic acid, methyl ester                                                  | C <sub>17</sub> H <sub>34</sub> O <sub>2</sub> |     | 25.822 | 112-39-0   | 96% |
| 2       | Linoleic acid, methyl ester         | 9,12-Octadecadienoic acid (Z, Z)-, methyl ester                                  | C <sub>19</sub> H <sub>34</sub> O <sub>2</sub> |     | 28.154 | 112-63-8   | 94% |
| 3       | Methyl Elaidate                     | 9-Octadecenoic acid, methyl ester, (E)-                                          | C <sub>19</sub> H <sub>36</sub> O <sub>2</sub> |      | 28.246 | 1937-62-8  | 96% |
| 4       | Methyl stearate                     | Octadecanoic acid, methyl ester                                                  | C <sub>19</sub> H <sub>38</sub> O <sub>2</sub> |     | 28.590 | 112-61-8   | 95% |
| 5       | Cannabidivarine                     | 2-((1S,6S)-3-methyl-6-(prop-1-en-2-yl) cyclohex-2-enyl)-5-propylbenzene-1,3-diol | C <sub>19</sub> H <sub>26</sub> O <sub>2</sub> |     | 30.106 | 24274-48-4 | 95% |
| 6       | cis-Methyl 11-eicosenoate           | cis-Methyl 11-eicosenoate                                                        | C <sub>21</sub> H <sub>40</sub> O <sub>2</sub> |      | 30.815 | 2390-09-2  | 95% |
| 7       | Δ <sup>9</sup> Tetrahydrocannabinol | (6aR,10aR)-6,6,9-trimethyl-3-propyl-6a,7,8,10a-tetrahydrobenzo[c]chromen-1-ol    | C <sub>19</sub> H <sub>26</sub> O <sub>2</sub> |  | 31.117 | 31262-37-0 | 90% |
| 8       | Cannabispiran                       | 4-hydroxy-6-methoxy Spiro[1,2-dihydroindene-3,4'-cyclohexane]-1'-one             | C <sub>15</sub> H <sub>18</sub> O <sub>3</sub> |    | 31.753 | 61262-81-5 | 90% |
| 9       | Cannabidiol                         | 2-[(1R,6R)-6-Isopropenyl-3-methylcyclohex-2-en-1-yl]-5-pentylbenzene-1,3-diol    | C <sub>21</sub> H <sub>30</sub> O <sub>2</sub> |    | 32.334 | 13956-29-1 | 90% |
| 10      | Cannabichromene                     | 2-Methyl-2-(4-methylpent-3-enyl)-7-pentyl-5-chromenol                            | C <sub>21</sub> H <sub>30</sub> O <sub>2</sub> |    | 32.468 | 20675-51-8 | 95% |
| 11      | Glycidyl Oleate                     | 9-Octadecenoic acid (Z)-, oxiranylmethyl ester                                   | C <sub>21</sub> H <sub>38</sub> O <sub>3</sub> |    | 32.868 | 5431-33-4  | 91% |
| 12      | Methyl erucate                      | 13-Docosenoic acid, methyl ester, (Z)-                                           | C <sub>23</sub> H <sub>44</sub> O <sub>2</sub> |    | 33.263 | 1120-34-9  | 91% |
| 13      | Methyl nervonate                    | 15-Tetracosenoic acid, methyl ester, (Z)-                                        | C <sub>25</sub> H <sub>48</sub> O <sub>2</sub> |    | 35.393 | 2733-88-2  | 93% |

Table 2 Semi- quantitative data (% Relative peak area value) of the compound in Hemp extracts <sup>a</sup>

| Sr. No. | Compound Name                                    | % Relative peak area |                   |                   |                   |                    |                    |                   |
|---------|--------------------------------------------------|----------------------|-------------------|-------------------|-------------------|--------------------|--------------------|-------------------|
|         |                                                  | Control              | T1                | T2                | T3                | T4                 | T5                 | T6                |
| 1.      | Hexadecanoic acid, methyl ester                  | 2.77 <sup>b</sup>    | 2.1±0.06          | 1.69 <sup>b</sup> | 1.99 <sup>b</sup> | 3.4 <sup>b</sup>   | 1.98±0.3           | 3.98 <sup>b</sup> |
| 2.      | (9,12-Octadecadienoic acid (Z,Z)-, methyl ester) | 1.54 <sup>b</sup>    | 1.2 <sup>b</sup>  | 1.19±0.1          | 1.11 <sup>b</sup> | 2.23 <sup>b</sup>  | 1.02 <sup>b</sup>  | 2.19±0.18         |
| 3.      | (9-Octadecenoic acid, methyl ester, (E)-)        | 13.11 <sup>b</sup>   | 9.78 <sup>b</sup> | 9.17 <sup>b</sup> | 8.84±0.19         | 17.09±0.09         | 9.04±0.06          | 19.28±0.09        |
| 4.      | Methyl stearate                                  | 2.06 <sup>b</sup>    | 1.53 <sup>b</sup> | 1.22 <sup>b</sup> | 1.42 <sup>b</sup> | 2.31±0.1           | 1.44±0.09          | 3.17 <sup>b</sup> |
| 5.      | cis-Methyl 11-eicosenoate                        | 14.56 <sup>b</sup>   | 1.59 <sup>b</sup> | 1.57 <sup>b</sup> | 9.57 <sup>b</sup> | 2.98±0.1           | 1.66 <sup>b</sup>  | 22.15±0.13        |
| 6.      | 9-Octadecenoic acid (Z)-, oxiranylmethyl ester   | 48.7±0.17            | 8.32 <sup>b</sup> | 0.99 <sup>b</sup> | 0.96 <sup>b</sup> | 16.63 <sup>b</sup> | 1.27 <sup>b</sup>  | 2.84±0.11         |
| 7.      | 13-Docosenoic acid, methyl ester, (Z)-           | 7.87 <sup>b</sup>    | 57.7±0.2          | 54.7±0.2          | 52.64±0.09        | 9.18 <sup>b</sup>  | 58.07 <sup>b</sup> | 12.31±0.18        |
| 8.      | 15-Tetracosenoic acid, methyl ester, (Z)-        | 9±0.09               | 2.88 <sup>b</sup> | 2.75 <sup>b</sup> | 2.7±0.09          | 5.49 <sup>b</sup>  | 3.01±0.07          | 6.65±0.17         |
| 9.      | Cannabispiran                                    | 0                    | 0                 | 0                 | 0.48 <sup>b</sup> | 0.68±0.06          | 0.54 <sup>b</sup>  | 0.6 <sup>b</sup>  |
| 10.     | Cannabichromene                                  | 0                    | 0.9±0.07          | 2.21 <sup>b</sup> | 1.2 <sup>b</sup>  | 2.25 <sup>b</sup>  | 1.35 <sup>b</sup>  | 0.98 <sup>b</sup> |
| 11.     | Cannabidivarin                                   | 0                    | 0.6 <sup>b</sup>  | 0.27 <sup>b</sup> | 0.74 <sup>b</sup> | 3.67±0.1           | 1.97±0.14          | 0.56±0.11         |
| 12.     | $\Delta^9$ -Tetrahydrocannabivarin               | 9.26 <sup>b</sup>    | 2.39 <sup>b</sup> | 4.7±0.2           | 4.87 <sup>b</sup> | 7.65±0.2           | 3.83±0.15          | 14.33±0.06        |
| 13.     | Cannabidiol                                      | 0                    | 3.29 <sup>b</sup> | 0.05 <sup>b</sup> | 3.7±0.2           | 13.1 <sup>b</sup>  | 7 <sup>b</sup>     | 0.27 <sup>b</sup> |
| 14.     | $\Delta^9$ -Tetrahydrocannabidiol                | 9.23 <sup>b</sup>    | 7.6 <sup>b</sup>  | 19.34±0.2         | 9.63 <sup>b</sup> | 13.06 <sup>b</sup> | 7.63±0.19          | 10.33±0.11        |

<sup>a</sup>Data are presented as mean± SD (n=3). <sup>b</sup>SD<0.05 level. Treatments:1) Control, 2) T1- Urea, 3) T2-Synthesized Urea Hydroxyapatite Nanofertilizer (UHAPF), 4) T3-*Bacillus megaterium* (B1), 5) T4-*Pseudomonas aeruginosa* (B2), 6) T5-B1+UHAPF, 7) T6- B2+UHAPF
